# Supplementary material for: Evolutionary methods for variable selection in the epidemiological modeling of cardiovascular diseases
Source: Springer Nature journal article supplement (doi:10.1186/s13040-018-0180-x), 2018-08-14
Supplement: 13040_2018_180_MOESM1_ESM.pdf [file 13040_2018_180_MOESM1_ESM.pdf]

**Table 1. Confusion matrix for the logistic regression on the full dataset**

|                   | Sick_true | Healthy_true |
|-------------------|-----------|--------------|
| Sick_predicted    | 321       | 198          |
| Healthy_predicted | 281       | 665          |

**Table 2. Confusion matrix for the logistic regression on the features selected by the stepwise method**

|                   | Sick_true | Healthy_true |
|-------------------|-----------|--------------|
| Sick_predicted    | 313       | 201          |
| Healthy_predicted | 289       | 662          |

**Table 3. Confusion matrix for the logistic regression on the features selected by the MOGA**

|                   | Sick_true | Healthy_true |
|-------------------|-----------|--------------|
| Sick_predicted    | 314       | 181          |
| Healthy_predicted | 288       | 682          |

**Table 4. Confusion matrix for the SVM model on the full dataset:**

**a) SVM, the degree of a polynomial kernel = 1.0**

|                   | Sick_true | Healthy_true |
|-------------------|-----------|--------------|
| Sick_predicted    | 342       | 242          |
| Healthy_predicted | 260       | 621          |

**b) SVM, the degree of a polynomial kernel = 1.5**

|                   | Sick_true | Healthy_true |
|-------------------|-----------|--------------|
| Sick_predicted    | 352       | 347          |
| Healthy_predicted | 250       | 516          |

**c) SVM, the degree of a polynomial kernel = 2.0**

|                   | Sick_true | Healthy_true |
|-------------------|-----------|--------------|
| Sick_predicted    | 360       | 340          |
| Healthy_predicted | 242       | 523          |

**Table 5. Confusion matrix for the SVM model on the features selected by the MOGA:**

**a) SVM, the degree of a polynomial kernel = 1.0**

|                   | Sick_true | Healthy_true |
|-------------------|-----------|--------------|
| Sick_predicted    | 306       | 173          |
| Healthy_predicted | 296       | 690          |

**b) SVM, the degree of a polynomial kernel = 1.5**

|                   | Sick_true | Healthy_true |
|-------------------|-----------|--------------|
| Sick_predicted    | 311       | 162          |
| Healthy_predicted | 291       | 701          |

**c) SVM, the degree of a polynomial kernel = 2.0**

|                   | Sick_true | Healthy_true |
|-------------------|-----------|--------------|
| Sick_predicted    | 303       | 187          |
| Healthy_predicted | 299       | 676          |
