# Supplementary material for: Evolutionary methods for variable selection in the epidemiological modeling of cardiovascular diseases
Source: Springer Nature journal article supplement (doi:10.1186/s13040-018-0180-x), 2018-08-14
Supplement: 13040_2018_180_MOESM2_ESM.pdf [file 13040_2018_180_MOESM2_ESM.pdf]

**Table 6. The list of selected variables with non-zero ranks based on stepwise selection**

| Variable description                                  | Ranks |                    |                     |
|-------------------------------------------------------|-------|--------------------|---------------------|
|                                                       | MOGA  | Stepwise selection | Pearson correlation |
| Cigarettes/day *years of smoking                      | 1.000 | 0.807              | 0.164               |
| Carotid artery internal wall maximum thickness (mm)   | 0.999 | 0.766              | 0.206               |
| Mean diastolic blood pressure (mmHg)                  | 1.000 | 0.757              | 0.199               |
| Age (years)                                           | 0.999 | 0.661              | 0.233               |
| Diabetes (yes, no)                                    | 0.999 | 0.635              | 0.138               |
| Maximal oxygen uptake (ml/kg/min)                     | 1.000 | 0.615              | -0.238              |
| Hair mercury ( $\mu\text{g/g}$ )                      | 0.997 | 0.573              | 0.149               |
| Serum triglyceride concentration measurement year     | 1.000 | 0.445              | -0.150              |
| Serum linolenic acid (% fatty acids)                  | 0.645 | 0.436              | -0.067              |
| LDL-cholesterol (mmol/l)                              | 1.000 | 0.402              | 0.151               |
| Plasma potassium (mmol/l)                             | 0.296 | 0.385              | 0.055               |
| Cheese consumption (g/day)                            | 1.000 | 0.291              | -0.169              |
| Hypertension in family (yes, no)                      | 0.306 | 0.290              | -0.055              |
| High-fat milk consumption (g/day)                     | 0.997 | 0.280              | 0.130               |
| Folate intake ( $\mu\text{g/day}$ )                   | 1.000 | 0.265              | -0.151              |
| Plasma fibrinogen (g/l)                               | 1.000 | 0.257              | 0.168               |
| Polyunsaturated to saturated fatty acids intake ratio | 0.106 | 0.256              | -0.047              |
| Sucrose intake (g/day)                                | 0.906 | 0.252              | -0.085              |
| Plasma ascorbic acid (mg/l)                           | 1.000 | 0.218              | -0.184              |
| Apple consumption (g/day)                             | 0.006 | 0.216              | 0.022               |
| Serum C-reactive protein (mg/l)                       | 0.994 | 0.204              | 0.115               |
| Wine intake (category)                                | 0.085 | 0.200              | -0.028              |
| Mean systolic blood pressure (mmHg)                   | 1.000 | 0.192              | 0.219               |
| Serum testosterone, free (pmol/l)                     | 0.005 | 0.191              | 0.025               |
| Hypertension (yes, no)                                | 1.000 | 0.184              | 0.192               |
| Serum total cholesterol (mmol/l)                      | 1.000 | 0.167              | 0.148               |
| Body mass index (kg/m <sup>2</sup> )                  | 1.000 | 0.158              | 0.165               |
| Serum albumin (g/l)                                   | 0.987 | 0.158              | -0.103              |
| Plasma calcium, active, (mmol/l)                      | 0.987 | 0.152              | 0.107               |
| Serum oleic acid (% fatty acids)                      | 0.490 | 0.152              | -0.067              |
| Serum fructosamine ( $\mu\text{mol/l}$ )              | 0.996 | 0.150              | 0.119               |
| Serum triglycerides measurement time                  | 0.007 | 0.148              | -0.023              |
| ECG P-Q interval (ms)                                 | 0.069 | 0.145              | 0.019               |
| Serum total n-6 fatty acids intake (mg/day)           | 0.001 | 0.143              | 0.005               |
| Pear consumption (g/day)                              | 0.291 | 0.142              | -0.054              |
| Urine sodium (mmol/l)                                 | 0.151 | 0.129              | 0.046               |
| Waist circumference (cm)                              | 0.999 | 0.127              | 0.133               |
| Beta blocker medication (yes, no)                     | 1.000 | 0.121              | 0.121               |
| ApoE phenotype 2-4 (yes, no)                          | 0.003 | 0.121              | -0.022              |
| Fructose intake (g/day)                               | 1.000 | 0.117              | -0.130              |
| High-fat cheese consumption (g/day)                   | 0.999 | 0.115              | -0.123              |
| ApoAIV phenotype 11-21 (yes, no)                      | 0.047 | 0.114              | 0.043               |
| Cancer history (yes, no)                              | 0.112 | 0.109              | -0.042              |
| Cranberry consumption (g/day)                         | 0.087 | 0.103              | 0.015               |
| Metabolic syndrome (yes, no)                          | 1.000 | 0.100              | 0.141               |
| Peonidin intake (mg/day)                              | 0.009 | 0.100              | 0.012               |
| Pyridoxine B6 intake (mg/day)                         | 0.032 | 0.097              | -0.040              |
| Blood erythrocyte count ( $10^{12}/\text{l}$ )        | 0.002 | 0.093              | 0.006               |
| High-fat unripened cheese consumption (g/day)         | 0.004 | 0.091              | -0.009              |

|                                                            |       |       |        |
|------------------------------------------------------------|-------|-------|--------|
| Low-fat cheese consumption (g/day)                         | 0.017 | 0.085 | -0.033 |
| Liquor drinker (yes, no)                                   | 0.003 | 0.083 | 0.000  |
| ECG Q-T interval (ms)                                      | 0.004 | 0.075 | 0.008  |
| Leisure time physical activity energy expenditure (kcal/d) | 0.007 | 0.071 | 0.000  |
| Jam consumption (g/day)                                    | 0.996 | 0.069 | -0.117 |
| Glucose intake (g/day)                                     | 0.972 | 0.067 | -0.103 |
| Shrimp consumption (g/day)                                 | 0.036 | 0.064 | -0.036 |
| Serum ApoA1 (g/l)                                          | 0.005 | 0.062 | 0.023  |
| Serum insulin (mU/l)                                       | 0.999 | 0.058 | 0.144  |
| Roots consumption (g/day)                                  | 0.926 | 0.057 | -0.088 |
| Cigarettes/day (n)                                         | 1.000 | 0.051 | 0.137  |
| Marital status (category)                                  | 0.953 | 0.050 | 0.095  |
| Canned fish consumption (g/day)                            | 0.373 | 0.048 | -0.059 |
| Cysteine intake (mg/day)                                   | 0.000 | 0.042 | -0.014 |
| Serum uric acid (mmol/l)                                   | 0.958 | 0.041 | 0.098  |
| Hypertension medication (yes, no)                          | 0.999 | 0.036 | 0.134  |
| Vitamin E supplement user (yes, no)                        | 0.419 | 0.034 | -0.055 |
| Waist to hip ratio                                         | 0.998 | 0.033 | 0.153  |
| Stroke in family (yes, no)                                 | 0.638 | 0.030 | 0.066  |
| Selective betablocker medication                           | 0.764 | 0.029 | 0.070  |
| Secoisolariciresinol intake ( $\mu\text{g}/\text{day}$ )   | 0.002 | 0.028 | 0.004  |
| Serum enterolactone (nmol/l)                               | 0.009 | 0.025 | 0.016  |
| Serum eicosapentaenoic acid (% fatty acids)                | 0.684 | 0.024 | 0.072  |
| Lycopene intake ( $\mu\text{g}/\text{day}$ )               | 0.003 | 0.021 | -0.007 |
| Malvidin intake (mg/d)                                     | 0.009 | 0.018 | 0.016  |
| Serum testosterone (nmol/l)                                | 0.122 | 0.017 | 0.051  |
| Tomato sauce (g/day)                                       | 0.008 | 0.014 | 0.003  |
| Neurosis medication (yes, no)                              | 0.056 | 0.012 | -0.032 |
| Methionine intake (mg/day)                                 | 0.024 | 0.009 | 0.028  |
| Rapeseed oil consumption (g/day)                           | 0.024 | 0.007 | -0.040 |
| Blood glutathionperoxidase (mU/gHb)                        | 0.003 | 0.007 | 0.004  |
| Milk consumption (g/day)                                   | 0.784 | 0.006 | 0.079  |
